# Supplementary material for: A novel mechanism of plasminogen activation in epithelial and mesenchymal cells
Source: PubMed Central journal article supplement (PMC6148250; doi:10.1038/s41598-018-32433-y), 2018-09-20
Supplement: 41598_2018_32433_MOESM1_ESM.pdf [file 41598_2018_32433_MOESM1_ESM.pdf]

## **plasminogen activation in epithelial & mesenchymal cells**

### **A novel mechanism of plasminogen activation in epithelial and mesenchymal cells**

**Moamen Bydoun<sup>1</sup>, PhD., Andra Sterea<sup>2</sup>, BSc. Ian C.G. Weaver<sup>1,4,5,6</sup>, Alamelu G. Bharadwaj<sup>3</sup>, PhD. and David M. Waisman<sup>1,3</sup> PhD.**

<sup>1</sup>Department of Pathology, <sup>2</sup>Department of Physiology and Biophysics, <sup>3</sup>Department of Biochemistry and Molecular Biology, <sup>4</sup>Department of Psychology and Neuroscience, <sup>5</sup>Department of Psychiatry, <sup>6</sup>Brain Repair Centre, Dalhousie University, Halifax, Nova Scotia, Canada.

Address: Charles Tupper Medical Building, 5850 College Street, 11L1, B3H4R2, Halifax, Nova Scotia, Canada

Correspondence

David.Waisman@dal.ca

PO Box 15000  
902-494-1803 (office)  
902-494-2766 (lab)  
902-494-1355 (fax)

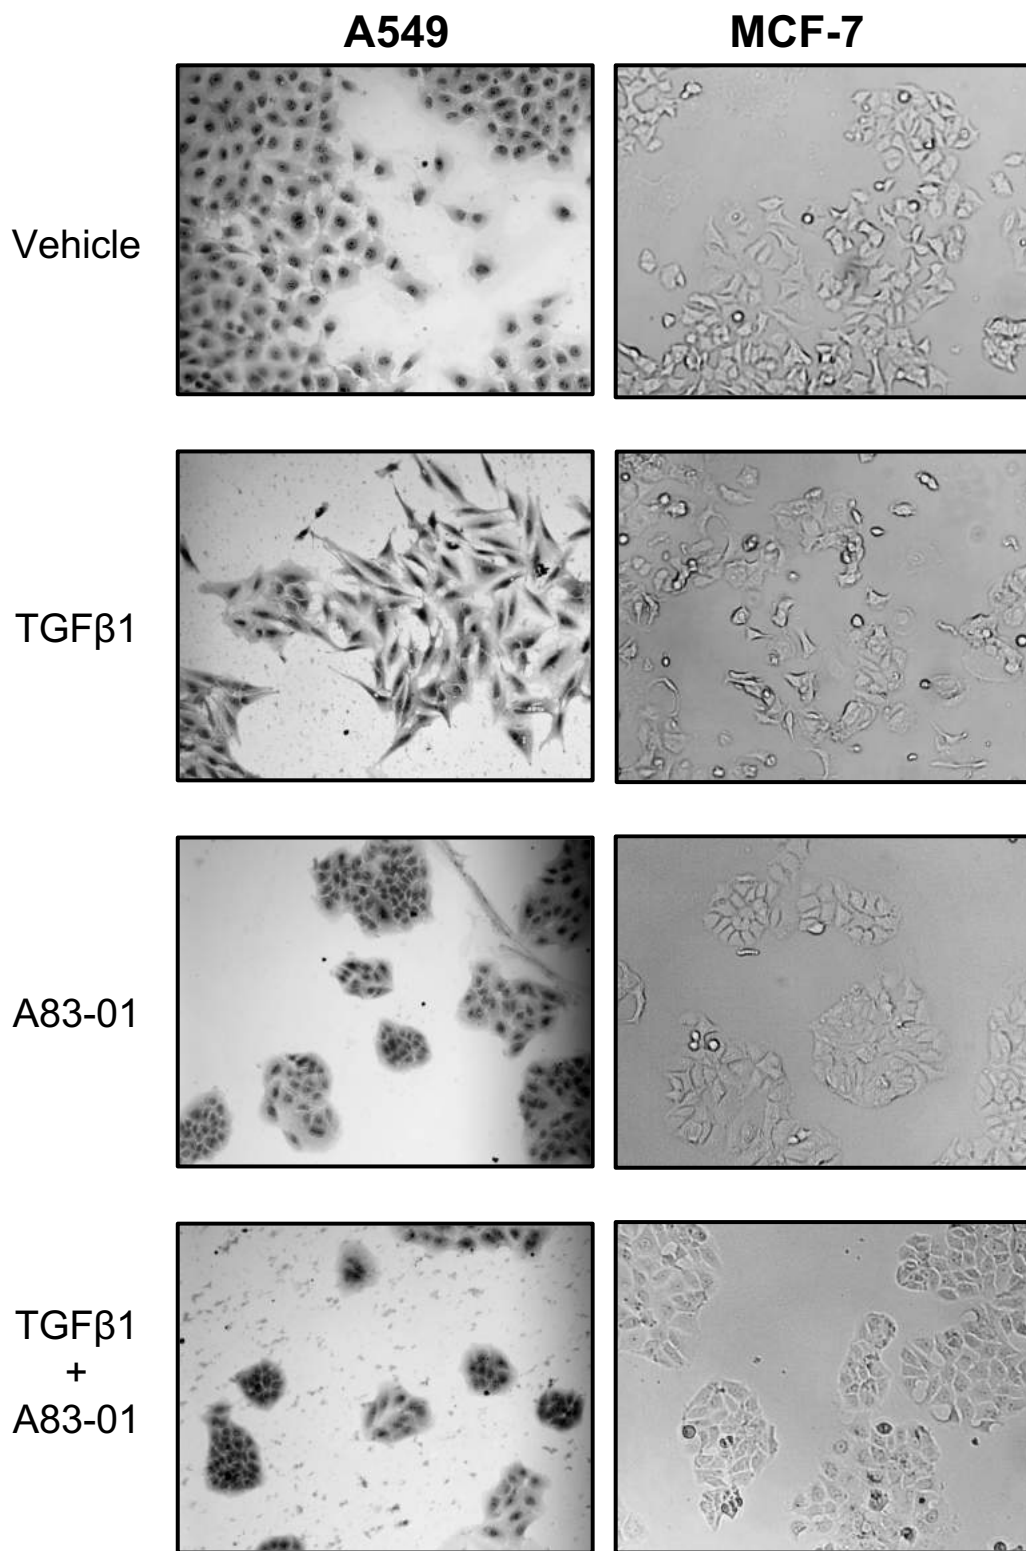

**Supplemental figure 1. TGFβ1 treatment of A549 and MCF-7 cells induces a mesenchymal-like morphology and can be reversed by TGFβR1 inhibition. Related to figure 1.** TGFβ1 induces a morphological change in both A549 and MCF-7 cells to become fibroblast-like mesenchymal cells compared to vehicle-treated cells. This change can be inhibited by the TGFβR1 inhibitor (A83-01) in vehicle-treated and TGFβ1-treated A549 and MCF-7 cells. A83-01 generated an epithelial-like phenotype that appears to be more epithelial than the vehicle-treated cells.

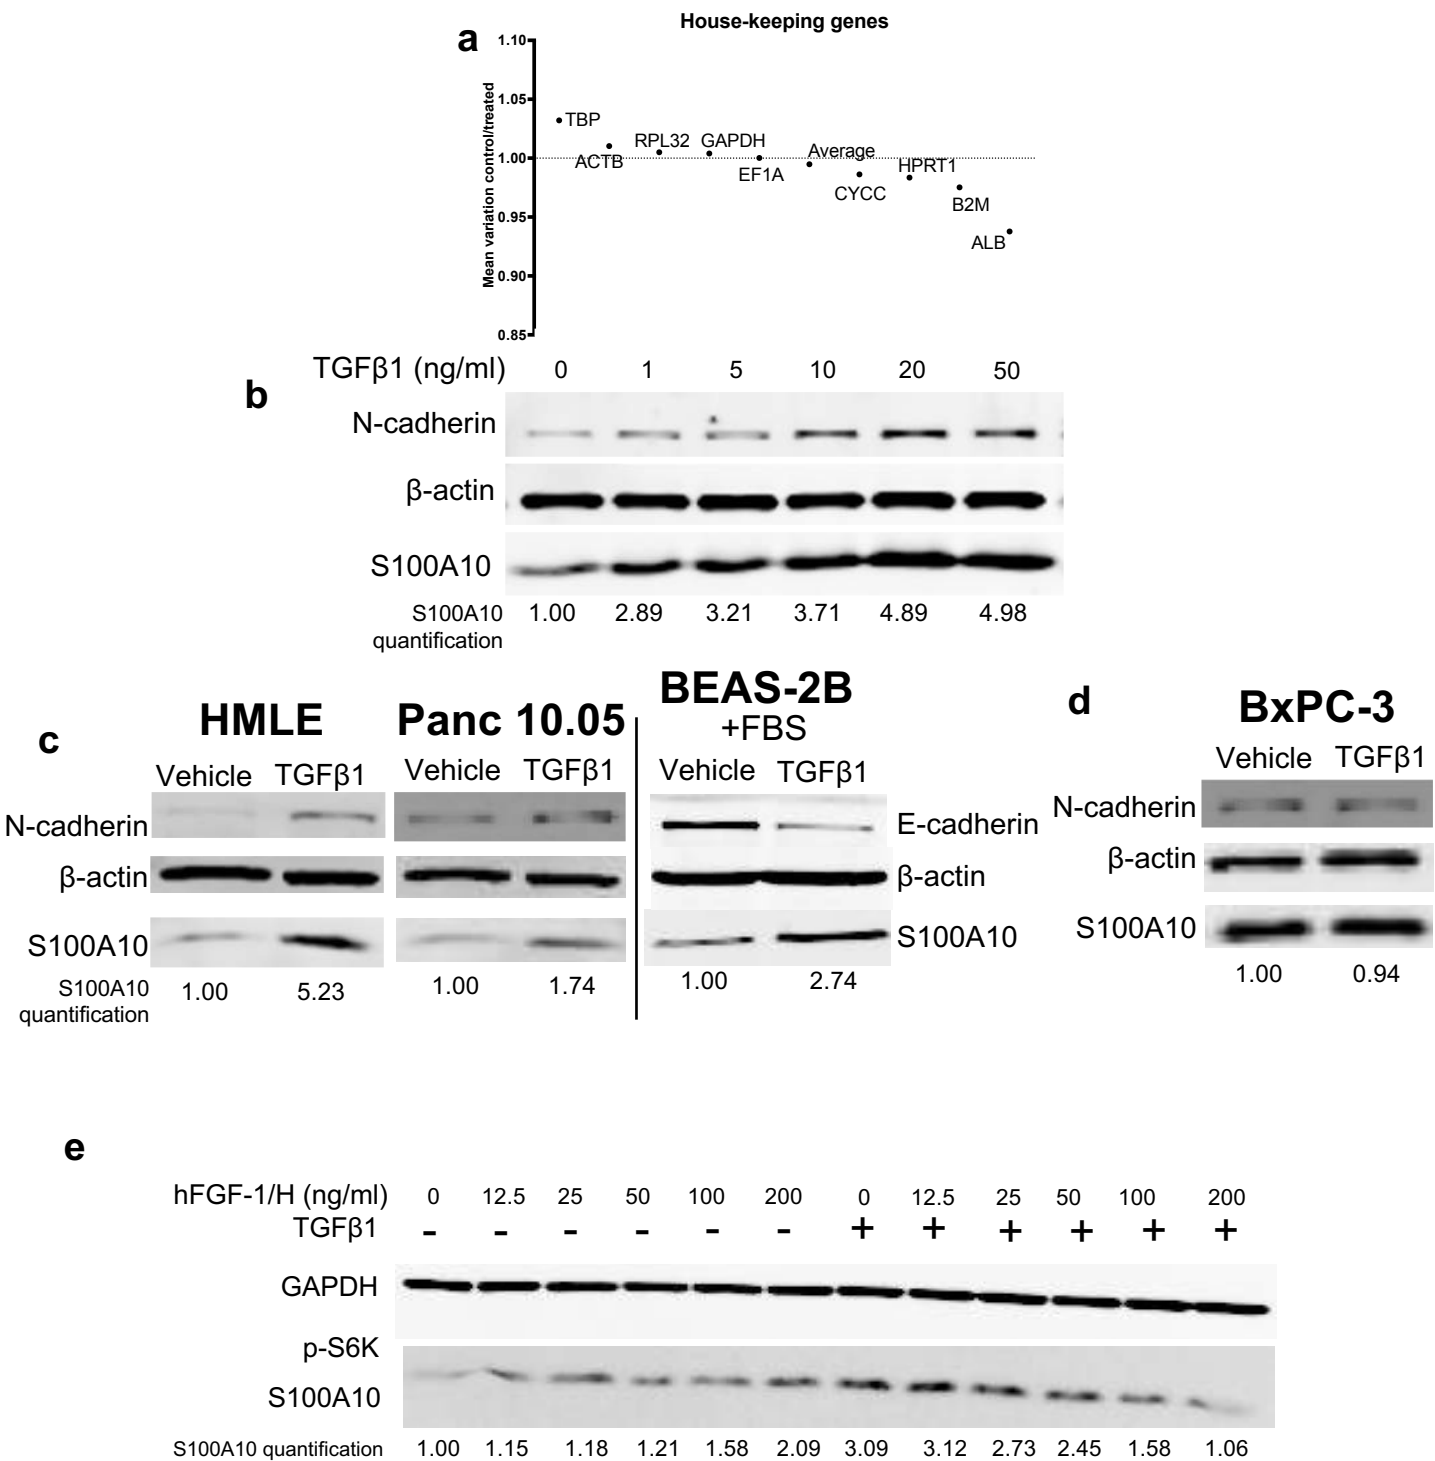

**Supplemental figure 2. TGFβ1 treatment upregulates S100A10 protein expression in multiple cancer cell lines. Related to figure 2.** (a) Identification of the most reliable house-keeping gene based on change of expression between untreated and treated samples. A value of “1” indicates no change in expression between untreated and treated samples. (b) Western blot analysis of S100A10 in A549 cells treated with an increasing concentrations of TGFβ1 ( 0, 1, 5, 10, 20 and 50 ng/ml). Western blot analysis of S100A10 in (c) HMLE , Panc 10.05, MCF-7 and BEAS-2B cells and (d) BxPC-3 treated with 20 ng/ml TGFβ1 for 8, 3, 4, 4 and 4 consecutive days respectively. (e) Western blot analysis and quantification of protein lysates from vehicle-treated and TGFβ1-treated BEAS-2B cells in the presence of ascending concentrations of 0 to 200 ng/ml of bhFGF-1/H after 72 hours.

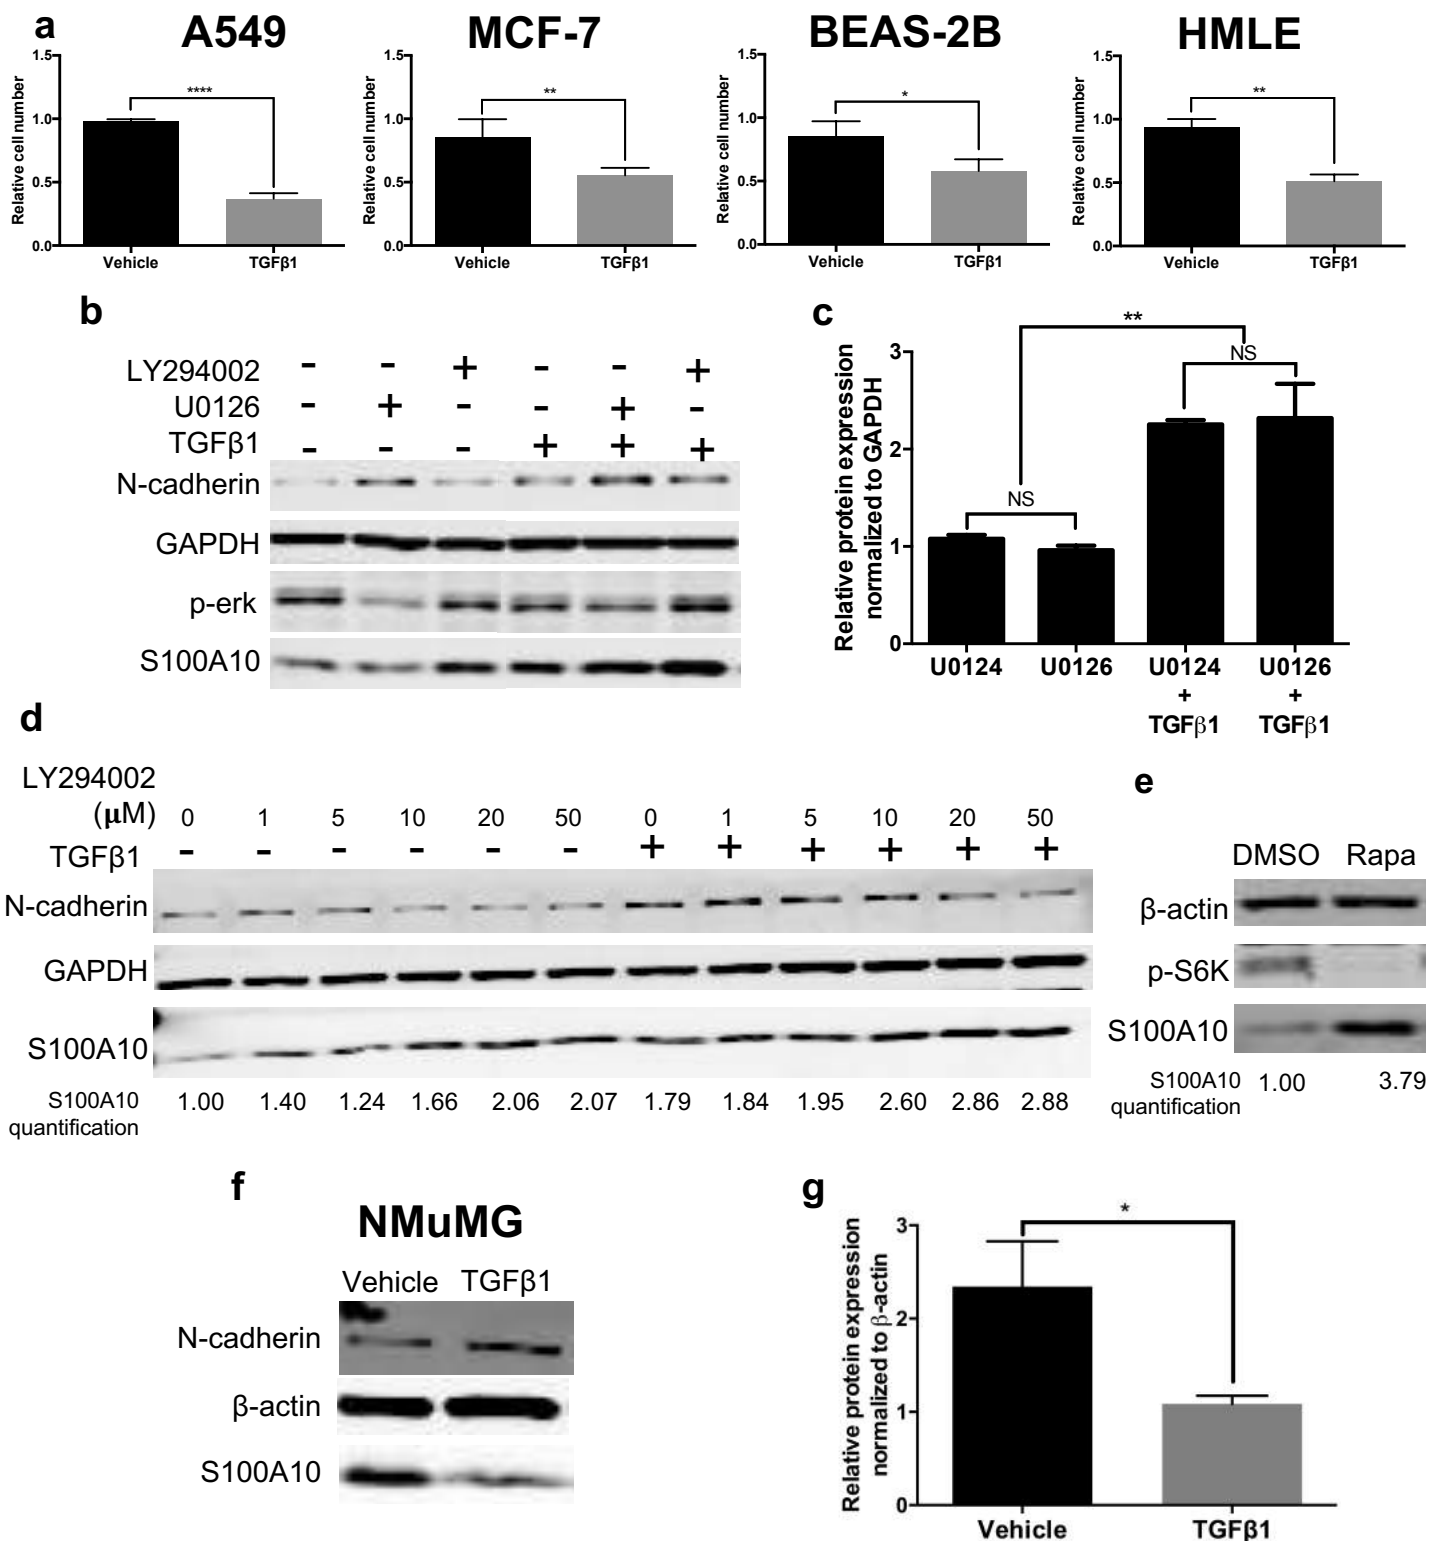

**Supplemental figure 3. PI3K signaling suppresses S100A10 expression. Related to figure 3.** (a) A549, MCF-7, BEAS-2B and HMLE cells were counted after 4 days (8 days for HMLE cells) of vehicle or TGFβ1 treatment using the Trypan blue dye. (b) Western blot analysis and S100A10 protein quantification (c) in A549 cells treated with the MEK inhibitor U0126 and PI3K inhibitor LY294002 in the presence or absence of TGFβ1. (d) Western blot analysis of S100A10 in A549 cells under treatment with increasing doses of LY294002 (0, 1, 5, 10, 20 and 50 μM) in the presence or absence of TGFβ1. (e) Western blot analysis of S100A10 in A549 cells treated with rapamycin (10 μM) for 48 hours. Western blot analysis (f) and quantification (g) of S100A10 in NMuMG cells treated with 20ng/ml TGFβ1 for three consecutive days.

a

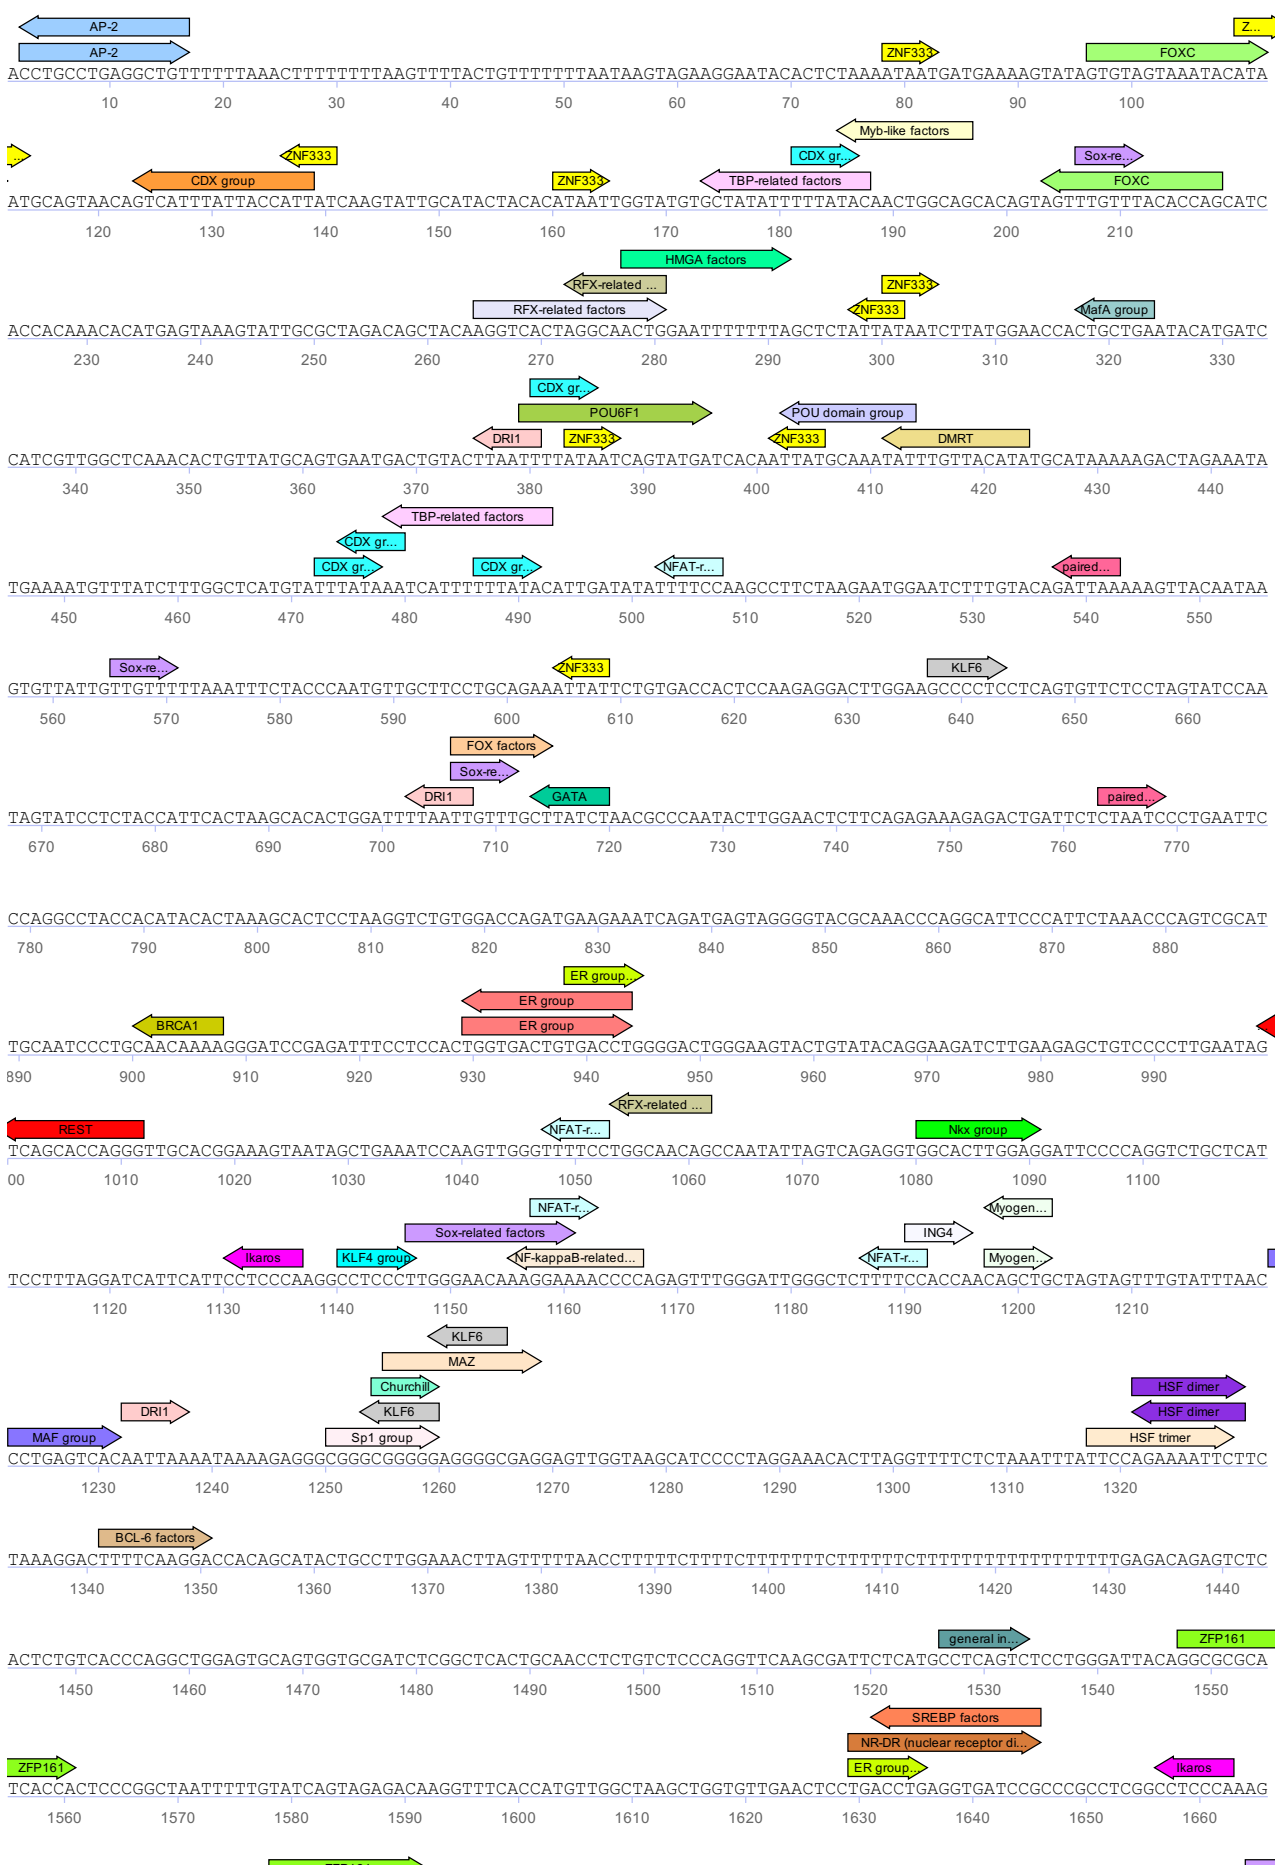

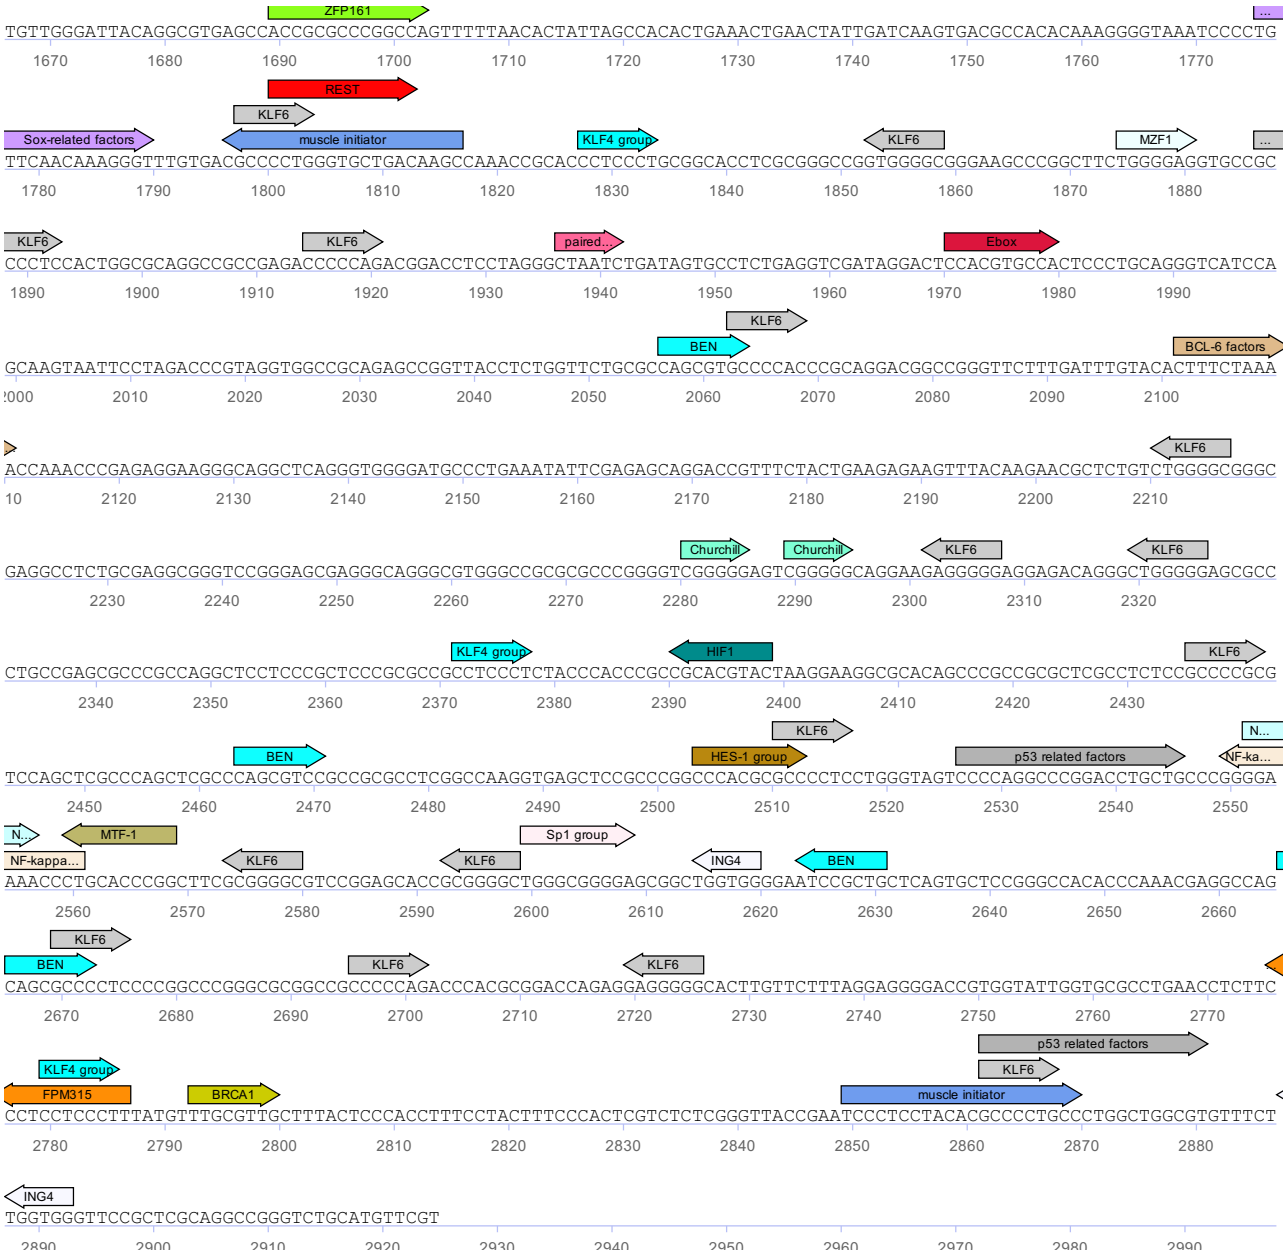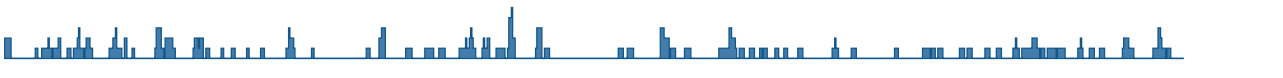

**b**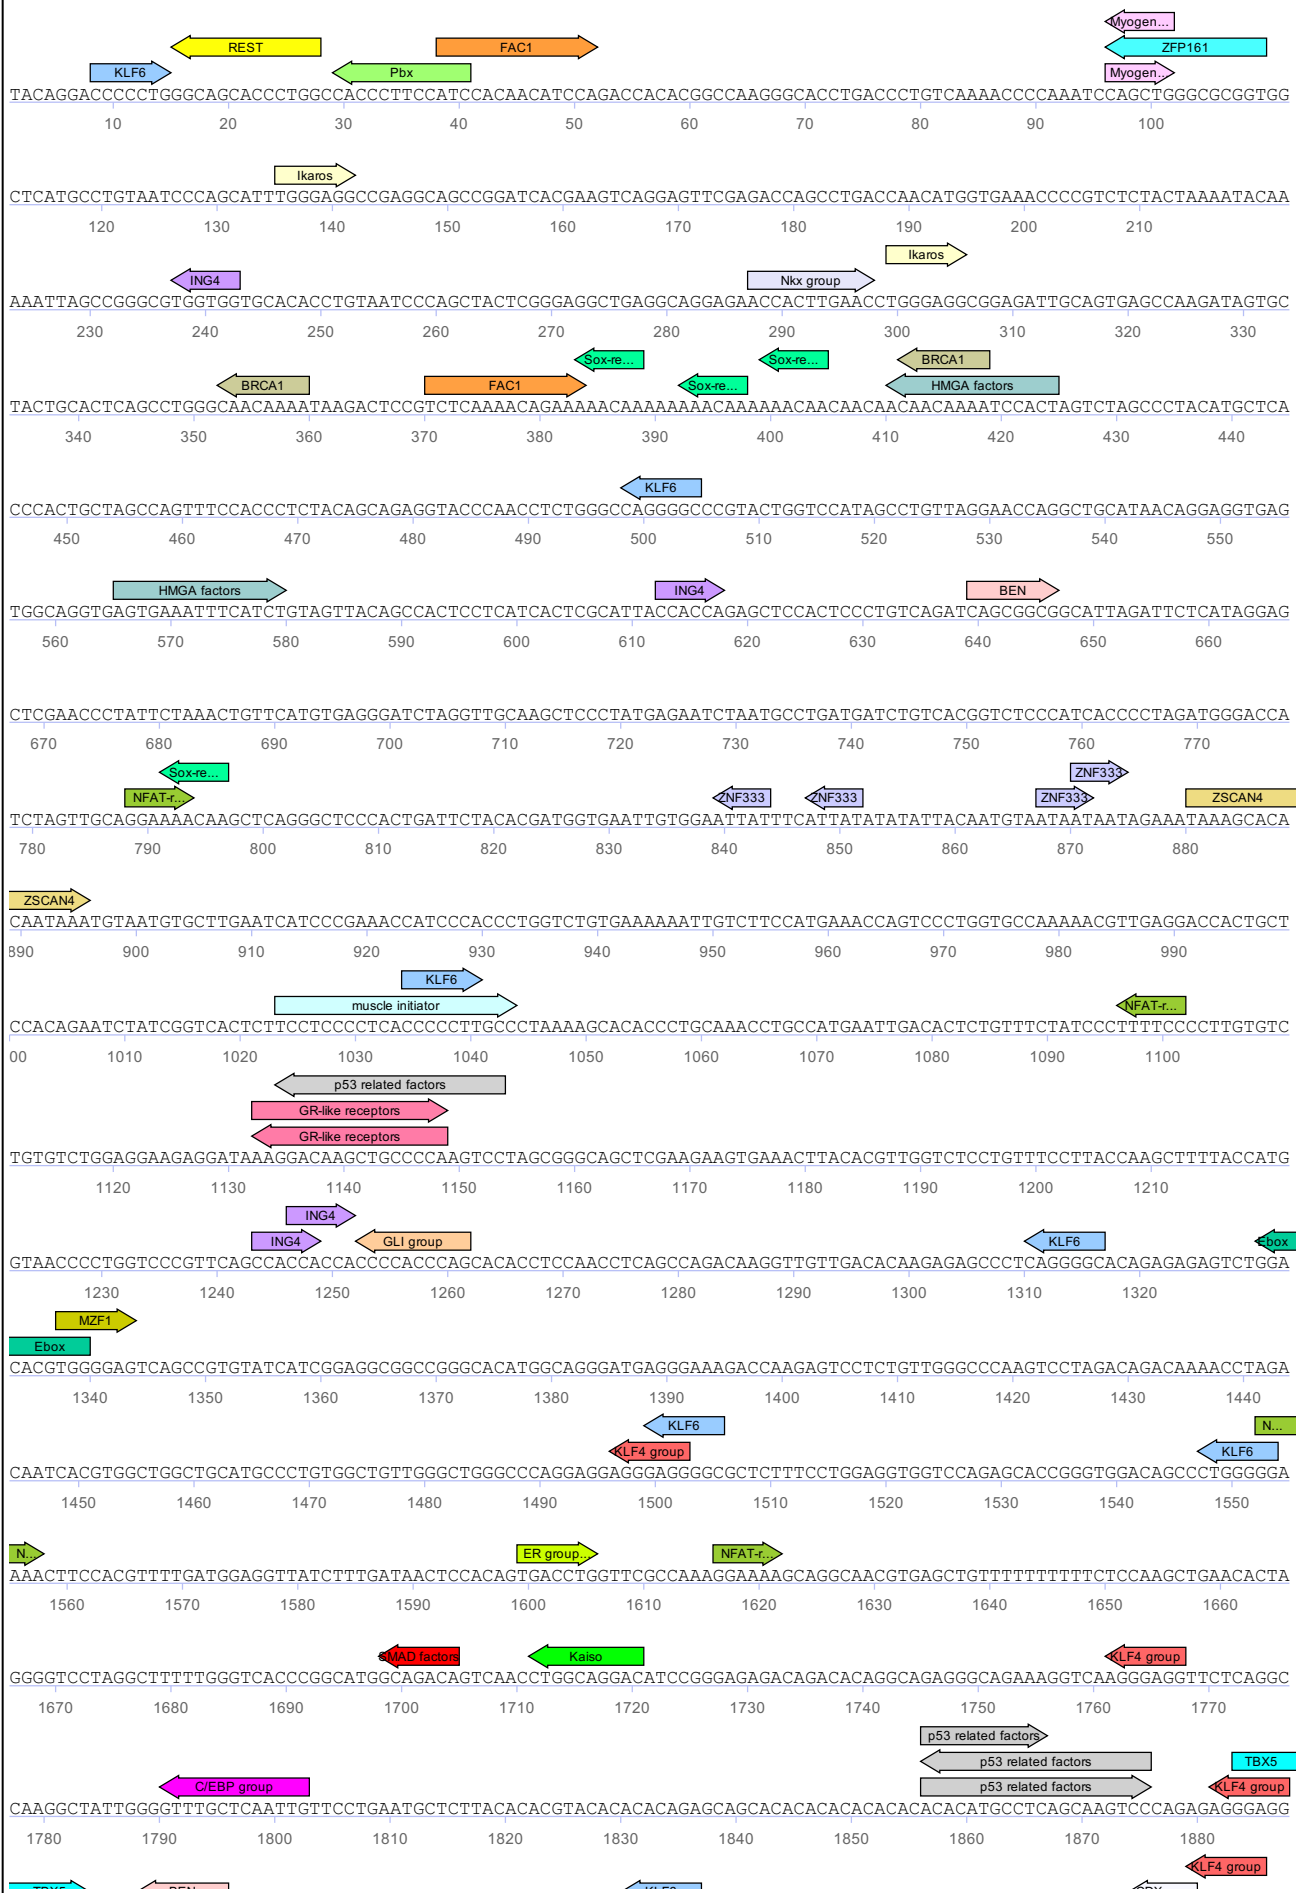

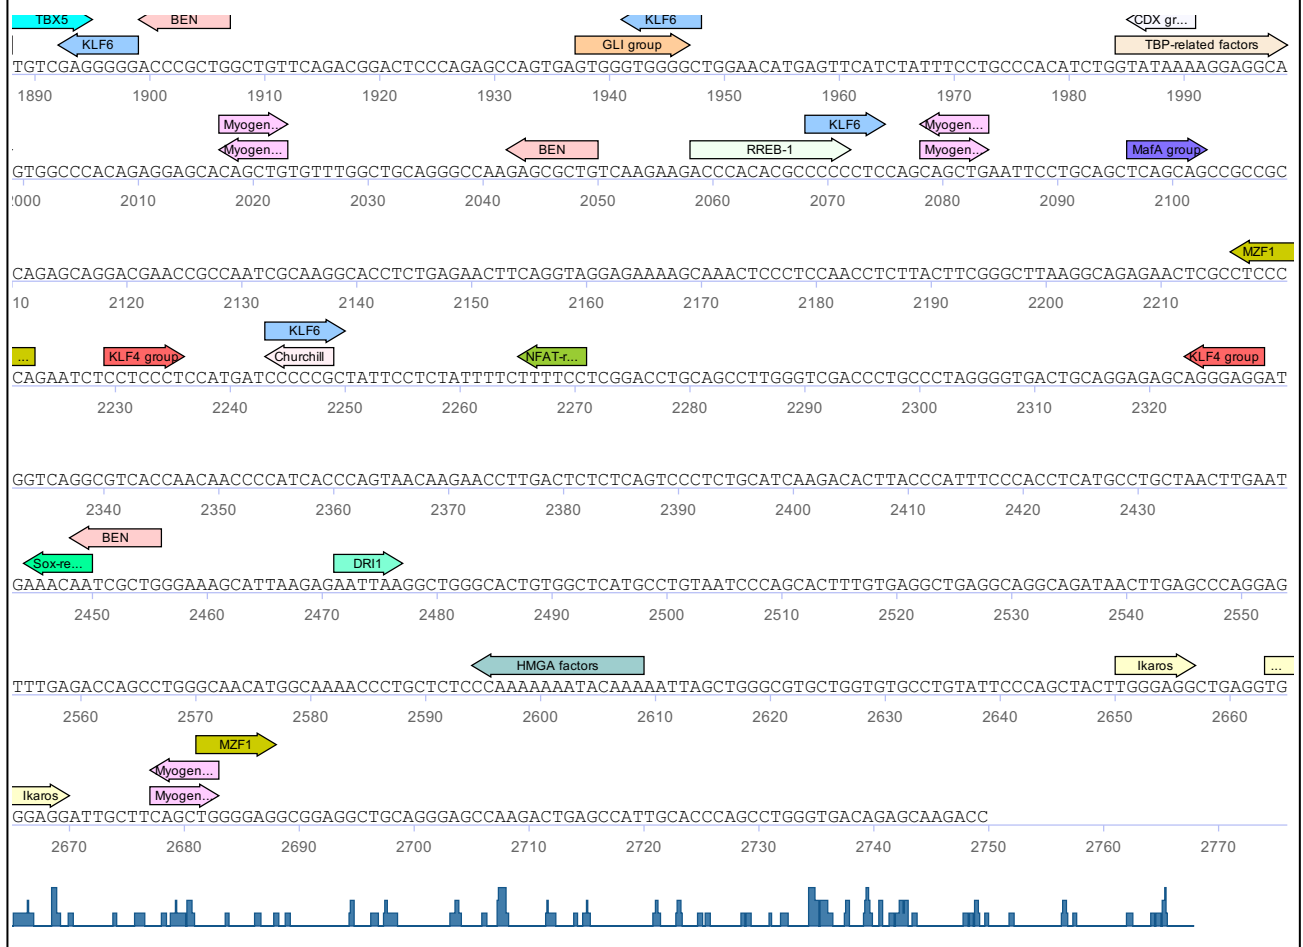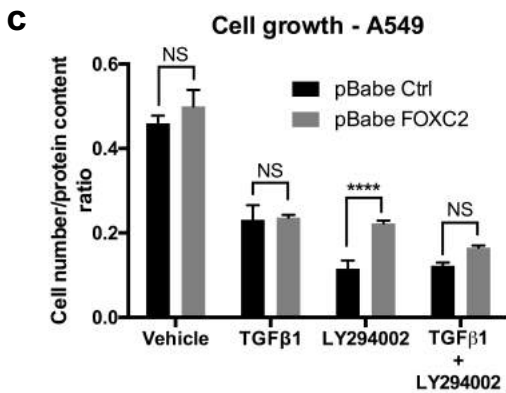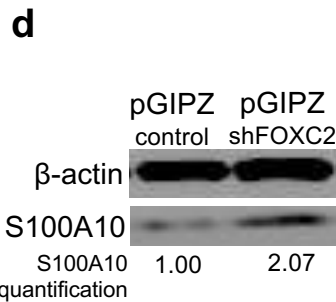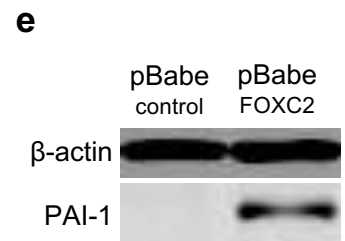

**Supplemental figure 4. FOXC2 represses S100A10 expression potentially through direct binding to promoter. Related to figure 3.** TRANSFAC analysis of all transcription factor binding sites in the S100A10 (a) and SERPINE1 (PAI-1) (b) promoter regions (2000bp upstream and 1000bp downstream of transcription start site). (c) Quantification of cell growth in A549 pBabe control and pBabe FOXC2 cells treated with TGFβ1 and/or LY294002 after 72 hours. (d) Western blot analysis of S100A10 in A549 cells subject to stable transfection with pGIPZ control or pGIPZ shFOXC2. (d) western blot analysis of PAI-1 in A549 pBabe control and pBabe FOXC2.



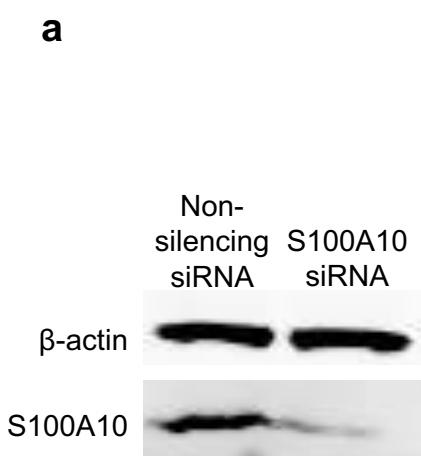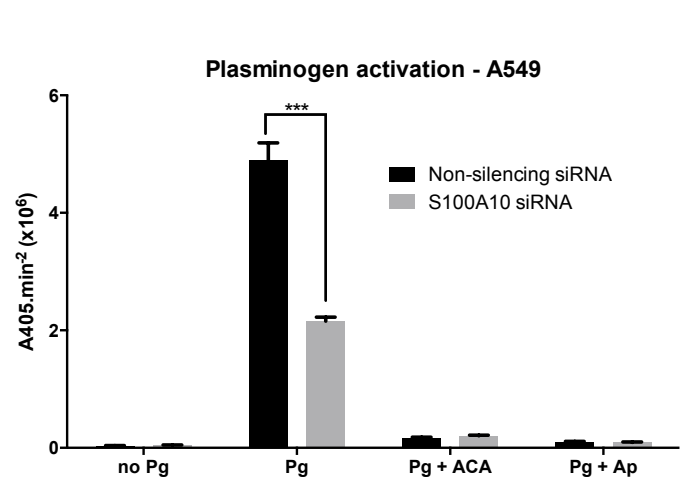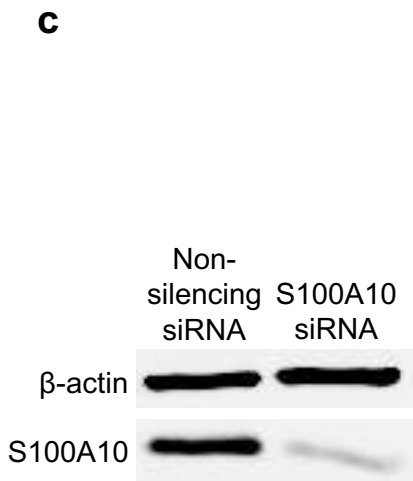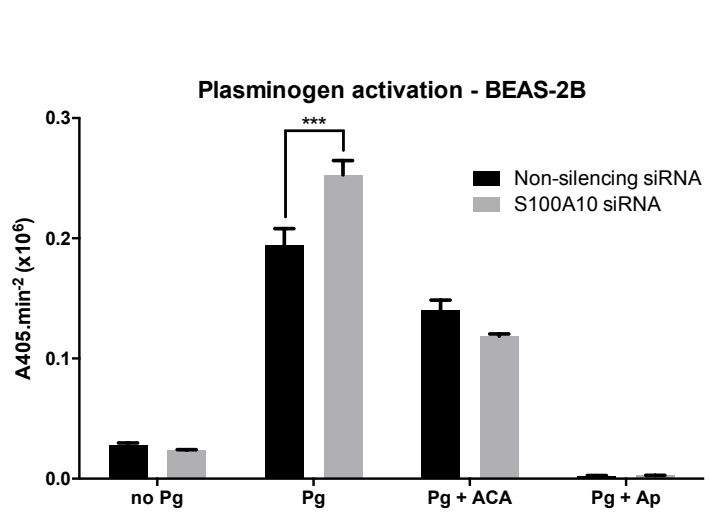

**Supplemental figure 5. S100A10 siRNA depletion reduces plasminogen activation at the cell surface of A549 but not BEAS-2B cells. Related to figure 5.** Western blot analysis of A549 (a) and BEAS-2B (c) cells which were transiently transfected with non-silencing siRNA or S100A10 siRNA. Plasminogen activation assay of A549 (b) and BEAS-2B (d) cells transfected with non-silencing siRNA and S100A10 siRNA.

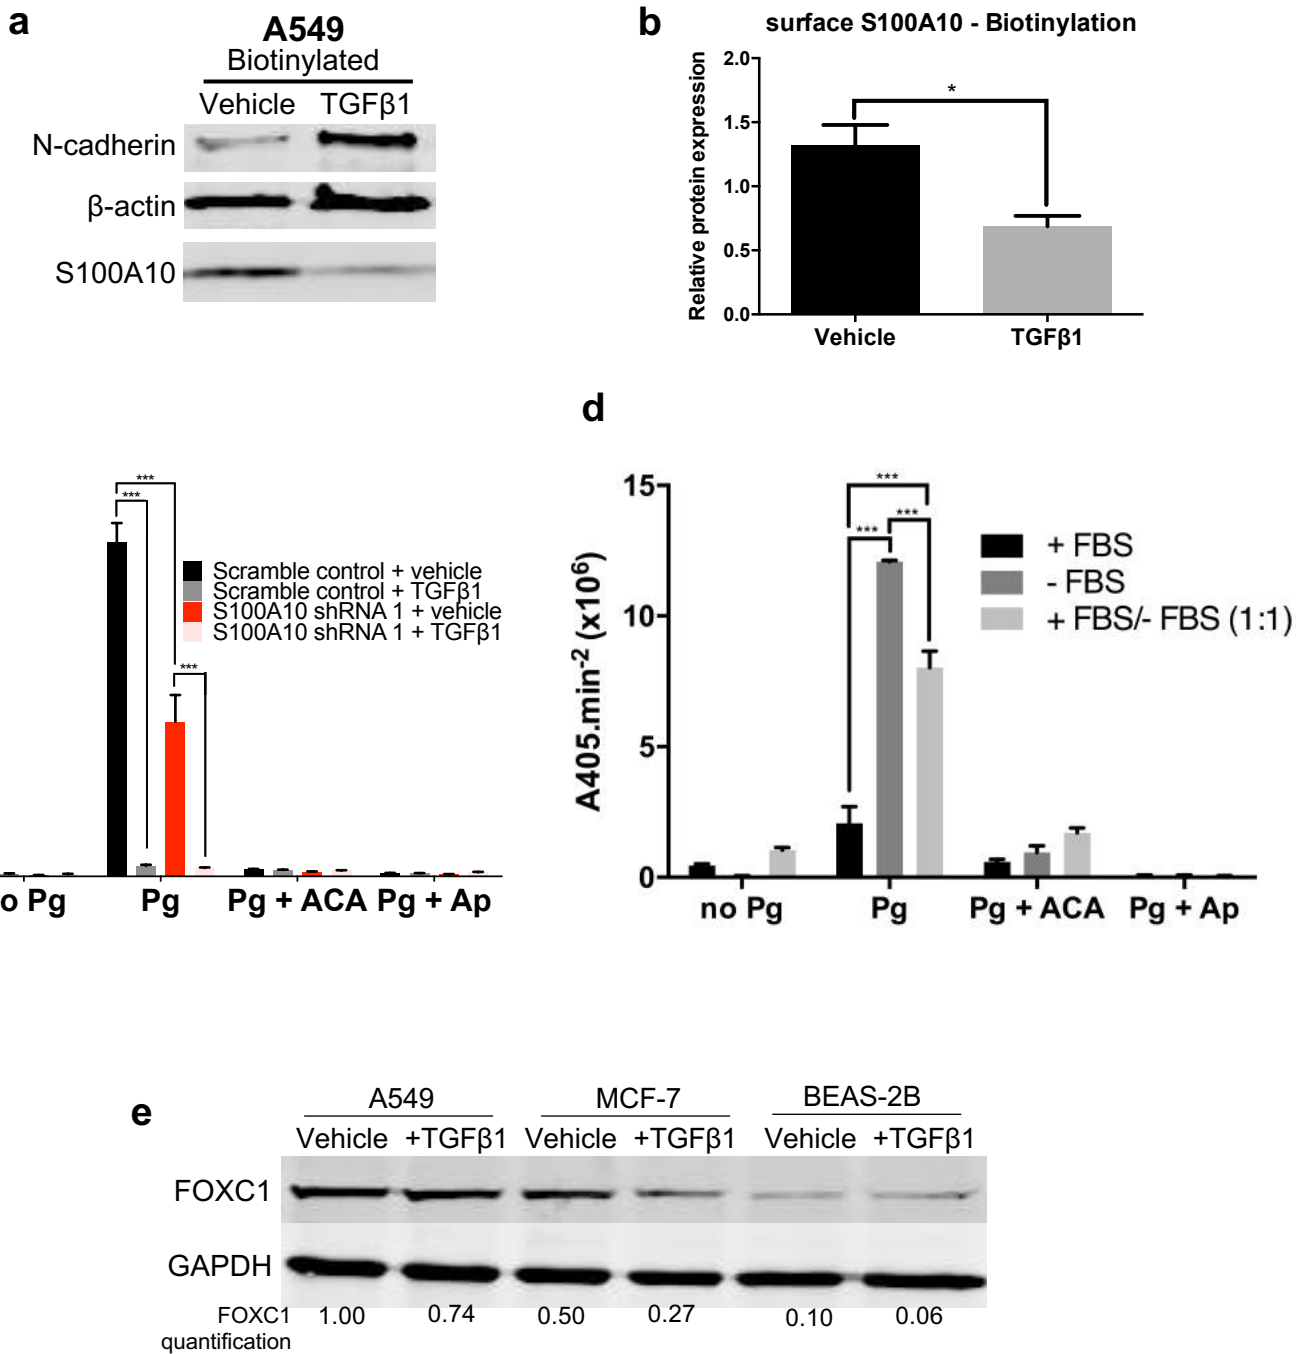

**Supplemental figure 6. TGFβ1 treatment and serum modulate plasminogen activation in A549 and BEAS-2B cells respectively partly due reduced cell surface expression of S100A10. Related to figure 6.** Western blot analysis (a) and quantification (b) of S100A10 expression in biotinylated lysates from vehicle- or TGFβ1-treated A549 cells. (c) Plasminogen activation of A549 cells with scramble control or S100A10 shRNA 1 and treated with vehicle or TGFβ1. (d) Plasminogen activation of BEAS-2B cells in the presence or absence serum (FBS) or an 1:1 ratio of serum-free and serum-supplemented cells. (e) Western blot analysis and quantification of FOXC1 in A549, MCF-7 and BEAS-2B cells treated with TGFβ1.

# Epithelial

High PA capacity  
Enhanced invasion

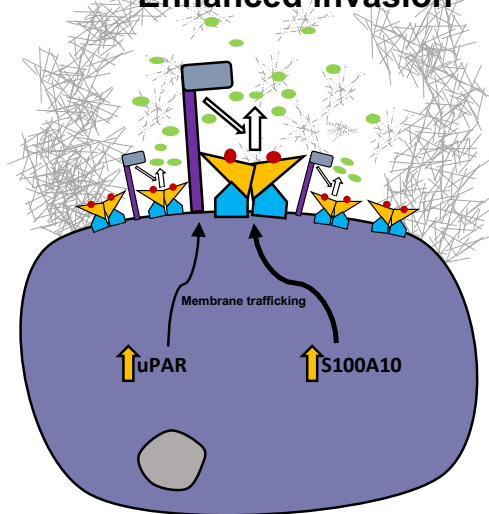

# Mesenchymal

Low PA capacity  
Reduced invasion

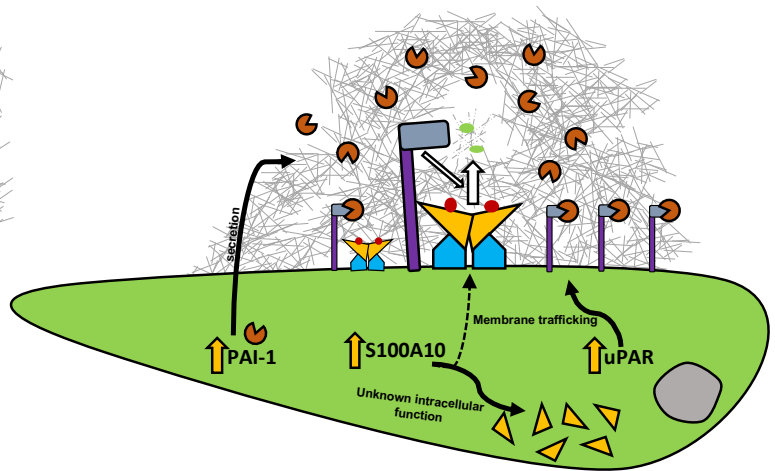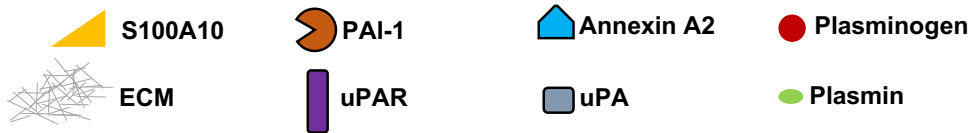

**Supplemental figure 7. Proposed model of plasminogen activation at the cell surface of epithelial and mesenchymal cells. Related to figure 8.** Although mesenchymal cells upregulate total S100A10 expression, epithelial cells express higher surface levels of S100A10 compared to mesenchymal cells. The latter are likely shuttling S100A10 for an unknown intracellular function. Similarly, both uPAR and PAI-1 are also upregulated in mesenchymal cells. PAI-1 release hinders plasminogen activation into plasmin by inhibiting uPAR-bound uPA. The decrease of plasmin generation reduces extracellular matrix (ECM) degradation. Noteworthy, S100A10 is expressed on the cell surface as part of the annexin A2-S100A10 heterotetramer.

|            | Significant? | P value     | Mean1   | Mean2   | Difference | SE of difference | t ratio   | df |
|------------|--------------|-------------|---------|---------|------------|------------------|-----------|----|
| ACTB       |              | 0.0655417   | 1.06665 | 1.88338 | -0.816729  | 0.32444          | 2.51735   | 4  |
| ANXA2      |              | 0.656983    | 140.376 | 151.382 | -11.006    | 22.9796          | 0.478947  | 4  |
| CTSA       |              | 0.132142    | 1886.19 | 1074.68 | 811.511    | 429.955          | 1.88743   | 4  |
| CTSB       | *            | 0.00804488  | 2572.34 | 5718.74 | -3146.41   | 642.144          | 4.89985   | 4  |
| CTSC       |              | 0.260814    | 9360.06 | 7389.73 | 1970.32    | 1505.76          | 1.30853   | 4  |
| CTSD       | *            | 4.50158E-05 | 16731.6 | 2174.22 | 14557.3    | 765.378          | 19.0198   | 4  |
| CTSE       |              | 0.369556    | 193396  | 243732  | -50336.3   | 49829.3          | 1.01017   | 4  |
| CTSF       |              | 0.134388    | 117314  | 75885   | 41429.3    | 22121.1          | 1.87285   | 4  |
| CTSG       |              | 0.412099    | 267066  | 208433  | 58633.1    | 64100.8          | 0.914702  | 4  |
| CTSH       |              | 0.116163    | 72219.2 | 42703.8 | 29515.3    | 14760.2          | 1.99965   | 4  |
| CTSK       | *            | 0.00518956  | 53672.3 | 92980.4 | -39308.1   | 7094.97          | 5.54028   | 4  |
| CTSL       |              | 0.0620989   | 303.94  | 192.236 | 111.704    | 43.4954          | 2.56817   | 4  |
| CTSO       |              | 0.0850339   | 197375  | 130735  | 66640.8    | 29262.3          | 2.27736   | 4  |
| CTSS       | *            | 0.00305958  | 96691.7 | 9001.16 | 87690.5    | 13700            | 6.40077   | 4  |
| CTSV       |              | 0.917622    | 52691.4 | 54063.5 | -1372.08   | 12460.5          | 0.110114  | 4  |
| CTSW       |              | 0.637492    | 291693  | 332518  | -40825     | 80193.1          | 0.509083  | 4  |
| CTSZ       |              | 0.111297    | 194861  | 125575  | 69286.4    | 34010.5          | 2.0372    | 4  |
| ENO1       |              | 0.0814024   | 3106.09 | 2283.33 | 822.756    | 355.092          | 2.31702   | 4  |
| HIST1H2BE  |              | 0.757777    | 4258.15 | 4655.26 | -397.108   | 1202.41          | 0.330259  | 4  |
| HMGB1      |              | 0.344148    | 116.294 | 193.952 | -77.6581   | 72.4519          | 1.07186   | 4  |
| ITGA2B     |              | 0.598057    | 323544  | 343787  | -20242.3   | 35401.1          | 0.571799  | 4  |
| ITGAM      |              | 0.0890787   | 290975  | 193003  | 97972.1    | 43828.2          | 2.23537   | 4  |
| ITGB2      |              | 0.493036    | 278371  | 319138  | -40767.2   | 54098.9          | 0.753569  | 4  |
| ITGB3      |              | 0.407994    | 239912  | 270401  | -30488.4   | 33012.5          | 0.92354   | 4  |
| KRT8       | *            | 0.0245433   | 9.70558 | 4.25953 | 5.44606    | 1.54903          | 3.51578   | 4  |
| MMP1       | *            | 0.00469768  | 66499.3 | 373558  | -307059    | 53920.4          | 5.69467   | 4  |
| MMP10      | *            | 0.00541865  | 9846.51 | 462807  | -452961    | 82742.1          | 5.47437   | 4  |
| MMP11      |              | 0.269333    | 380369  | 275004  | 105365     | 82234.3          | 1.28127   | 4  |
| MMP12      |              | 0.45227     | 297901  | 339352  | -41450.5   | 49829.2          | 0.831851  | 4  |
| MMP13      |              | 0.339444    | 535358  | 697862  | -162503    | 149950           | 1.08372   | 4  |
| MMP14      |              | 0.482827    | 195934  | 210831  | -14897     | 19279.4          | 0.772689  | 4  |
| MMP15      |              | 0.945628    | 289955  | 284156  | 5799.18    | 79904.7          | 0.0725762 | 4  |
| MMP16      |              | 0.827978    | 409330  | 397835  | 11494.8    | 49562.4          | 0.231925  | 4  |
| MMP17      |              | 0.361487    | 332274  | 258496  | 73778.8    | 71675.7          | 1.02934   | 4  |
| MMP19      |              | 0.055105    | 266018  | 200290  | 65728      | 24505.6          | 2.68216   | 4  |
| MMP2       | *            | 0.000152514 | 112405  | 288096  | -175692    | 12581            | 13.9648   | 4  |
| MMP20      |              | 0.853672    | 307686  | 296120  | 11566      | 58808.6          | 0.196672  | 4  |
| MMP21      |              | 0.839517    | 425599  | 409984  | 15615.2    | 72274.9          | 0.216053  | 4  |
| MMP23A/23B |              | 0.259226    | 515981  | 331526  | 184454     | 140408           | 1.3137    | 4  |
| MMP24      | *            | 0.00589544  | 194384  | 83372.1 | 111012     | 20759.6          | 5.34752   | 4  |

|             |   |             |                |         |          |         |           |   |
|-------------|---|-------------|----------------|---------|----------|---------|-----------|---|
| MMP24-AS1   |   | 0.119836    | 42212.931079.9 | 11133.1 | 5644.36  | 1.97243 | 4         |   |
| MMP25       |   | 0.305215    | 230548         | 207671  | 22877.1  | 19472.2 | 1.17486   | 4 |
| MMP26       |   | 0.311743    | 421357         | 268669  | 152687   | 131994  | 1.15677   | 4 |
| MMP27       |   | 0.610768    | 225605         | 244811  | -19206.6 | 34838.1 | 0.551309  | 4 |
| MMP28       |   | 0.159793    | 228389         | 281823  | -53433.3 | 30993.1 | 1.72404   | 4 |
| MMP3        | * | 0.0395219   | 245540         | 321228  | -75687.8 | 25139.3 | 3.01073   | 4 |
| MMP7        | * | 0.00348635  | 199413         | 238.3   | 199175   | 32237.4 | 6.17838   | 4 |
| MMP8        |   | 0.264265    | 367913         | 313873  | 54039.8  | 41652.9 | 1.29739   | 4 |
| MMP9        |   | 0.173403    | 125029         | 174036  | -49007.8 | 29623.9 | 1.65433   | 4 |
| PLAT        | * | 0.00501131  | 59076.7        | 327208  | -268131  | 47931.2 | 5.59408   | 4 |
| PLAU        |   | 0.0622362   | 114.606        | 10509   | -10394.4 | 4050.67 | 2.56608   | 4 |
| PLAUR       | * | 0.00604463  | 2644.46        | 25480.7 | -22836.3 | 4300.3  | 5.31039   | 4 |
| PLG         |   | 0.761346    | 390284         | 362913  | 27371.1  | 84173.3 | 0.325175  | 4 |
| PLGRKT      |   | 0.0596164   | 16554.7        | 8881.24 | 7673.5   | 2943.58 | 2.60686   | 4 |
| RUVBL1      |   | 0.0613583   | 6309.61        | 4839.27 | 1470.35  | 570.007 | 2.57952   | 4 |
| S100A10     | * | 0.000508743 | 83.6273        | 423.151 | -339.523 | 33.091  | 10.2603   | 4 |
| S100A4      | * | 0.021085    | 30.8968        | 6.87697 | 24.0199  | 6.51579 | 3.68641   | 4 |
| SERPINA1    |   | 0.977307    | 72287.8        | 73351.7 | -1063.87 | 35154.1 | 0.0302631 | 4 |
| SERPINA10   |   | 0.437131    | 408445         | 316902  | 91543.4  | 106157  | 0.862344  | 4 |
| SERPINA12   |   | 0.177996    | 209476         | 275862  | -66386.1 | 40675.4 | 1.6321    | 4 |
| SERPINA2    |   | 0.542926    | 410246         | 443578  | -33332.2 | 50188.3 | 0.664143  | 4 |
| SERPINA3    |   | 0.0729967   | 358348         | 204801  | 153547   | 63527   | 2.41704   | 4 |
| SERPINA4    |   | 0.0833094   | 279671         | 206226  | 73444.7  | 31988.8 | 2.29595   | 4 |
| SERPINA5    |   | 0.42862     | 215158         | 277864  | -62706.4 | 71268.4 | 0.879863  | 4 |
| SERPINA6    | * | 0.000446666 | 399969         | 47314.7 | 352655   | 33237.6 | 10.6101   | 4 |
| SERPINA7    |   | 0.30982     | 322074         | 227708  | 94365.8  | 81205.2 | 1.16207   | 4 |
| SERPINA9    | * | 0.0180716   | 64698.5        | 123471  | -58772.9 | 15206.8 | 3.8649    | 4 |
| SERPINB1    | * | 1.95894E-05 | 61986.9        | 5475.71 | 56511.2  | 2409.43 | 23.4542   | 4 |
| SERPINB10   |   | 0.856401    | 312501         | 326968  | -14467.9 | 74983.7 | 0.192947  | 4 |
| SERPINB11   |   | 0.505211    | 364216         | 324753  | 39463.4  | 53974.3 | 0.731153  | 4 |
| SERPINB12   |   | 0.985868    | 283861         | 281805  | 2056.6   | 109138  | 0.018844  | 4 |
| SERPINB13   |   | 0.272733    | 425399         | 384133  | 41266.5  | 32477.2 | 1.27063   | 4 |
| SERPINB2    |   | 0.820274    | 494131         | 461659  | 32471.7  | 133870  | 0.242562  | 4 |
| SERPINB3    | * | 0.0151873   | 352309         | 207454  | 144855   | 35566   | 4.07285   | 4 |
| SERPINB3/B4 | * | 0.010058    | 246752         | 130380  | 116372   | 25317.9 | 4.59642   | 4 |
| SERPINB4    |   | 0.126558    | 449017         | 311405  | 137611   | 71490.6 | 1.92489   | 4 |
| SERPINB5    |   | 0.866615    | 448047         | 466398  | -18351.3 | 102503  | 0.179032  | 4 |
| SERPINB6    |   | 0.659616    | 145559         | 161584  | -16024.8 | 33742.6 | 0.474914  | 4 |
| SERPINB7    | * | 0.00361606  | 285737         | 104691  | 181046   | 29595.5 | 6.11735   | 4 |
| SERPINB8    |   | 0.336268    | 121859         | 98346.9 | 23511.7  | 21534.5 | 1.09181   | 4 |
| SERPINB9    |   | 0.271465    | 59337.3        | 43647.1 | 115690.2 | 12310   | 1.27459   | 4 |
| SERPINC1    |   | 0.557411    | 339460         | 310797  | 28663.4  | 44836.6 | 0.639287  | 4 |
| SERPIND1    |   | 0.909029    | 412118         | 419110  | -6992.77 | 57474.1 | 0.121668  | 4 |

|          |   |             |         |         |          |         |           |   |
|----------|---|-------------|---------|---------|----------|---------|-----------|---|
| SERPINE1 | * | 0.015365    | 225.648 | 188463  | -188237  | 46378.5 | 4.05871   | 4 |
| SERPINE2 | * | 0.000295171 | 409.58  | 28035.5 | -27625.9 | 2341.13 | 11.8003   | 4 |
| SERPINF1 |   | 0.131914    | 376471  | 302248  | 74223    | 39293.7 | 1.88893   | 4 |
| SERPINF2 | * | 0.0396057   | 222236  | 161020  | 61216.6  | 20347.3 | 3.00858   | 4 |
| SERPING1 |   | 0.340708    | 387056  | 508577  | -121521  | 112465  | 1.08052   | 4 |
| SERPINH1 |   | 0.165028    | 9334.56 | 14130.3 | -4795.74 | 2826.82 | 1.69651   | 4 |
| SERPINI1 |   | 0.0738383   | 237296  | 373100  | -135804  | 56433.3 | 2.40645   | 4 |
| SERPINI2 |   | 0.61928     | 319009  | 307210  | 11798.8  | 21941.4 | 0.53774   | 4 |
| TIMP1    |   | 0.386609    | 102.239 | 74.0368 | 28.2023  | 29.0497 | 0.970828  | 4 |
| TIMP2    | * | 0.0121503   | 968.717 | 27537   | -26568.2 | 6106.64 | 4.35071   | 4 |
| TIMP3    | * | 0.000638519 | 17834.8 | 246146  | -228311  | 23597.2 | 9.67534   | 4 |
| TIMP4    |   | 0.369286    | 73150.2 | 51614.7 | 21535.5  | 21305.2 | 1.01081   | 4 |
| KLK1     |   | 0.982762    | 141113  | 140693  | 420.128  | 18277.1 | 0.0229866 | 4 |
| KLK2     |   | 0.637777    | 362861  | 396745  | -33883.9 | 66617   | 0.508638  | 4 |
| KLK3     |   | 0.918952    | 290340  | 292330  | -1990.5  | 18374.7 | 0.108329  | 4 |
| KLK4     |   | 0.747751    | 180908  | 171971  | 8937.03  | 25934.6 | 0.344599  | 4 |
| KLK5     |   | 0.160476    | 100580  | 81143.5 | 19436.2  | 11297.6 | 1.72039   | 4 |
| KLK6     |   | 0.0988511   | 139809  | 177246  | -37437.4 | 17476.7 | 2.14213   | 4 |
| KLK7     |   | 0.969859    | 201993  | 200993  | 999.453  | 24861   | 0.0402016 | 4 |
| KLK8     |   | 0.544346    | 194907  | 219726  | -24818.8 | 37508.5 | 0.661685  | 4 |
| KLK9     |   | 0.309813    | 358755  | 296180  | 62575.3  | 53847.5 | 1.16208   | 4 |
| KLK10    |   | 0.141366    | 539383  | 356994  | 182390   | 99712.3 | 1.82916   | 4 |
| KLK11    |   | 0.28774     | 262501  | 355155  | -92654.5 | 75629.4 | 1.22511   | 4 |
| KLK12    |   | 0.529046    | 166905  | 158212  | 8692.7   | 12627.4 | 0.688401  | 4 |
| KLK13    |   | 0.426468    | 309352  | 367068  | -57716.3 | 65265   | 0.884338  | 4 |
| KLK14    | * | 0.00230252  | 313009  | 202912  | 110097   | 15935.8 | 6.90876   | 4 |
| KLK15    | * | 0.0178079   | 284197  | 351997  | -67799.7 | 17464.2 | 3.88221   | 4 |

**Supplemental Table 1. Gene expression analysis of 130 components of the plasminogen activation system in response to TGF $\beta$ 1 treatment in A549 cells.** These components include plasminogen activators (*PLAU*, *PLAT*), plasminogen activator receptors (*PLAUR*), plasminogen activator inhibitors (e.g. *SERPINE1*), plasminogen receptors (e.g. *ENO1*, *HMGB1*, *RUVBL1*, *SI00A10*), MMPs, MMP inhibitors (*TIMPs*) and kallikreins (*KLKs*). The expression data of vehicle-treated and TGF $\beta$ 1-treated (72-hour time point) cells was obtained from the gene expression omnibus (GEO; access code GSE17708) (Sartor *et al.* 2010). The expression values were first normalized against the expression house-keeping gene *EF1A* then against a sample with the lowest normalized expression value. The cut-off for the adjusted p-value was 0.05.
